# Supplementary material
Source: bioRxiv or medRxiv preprint supplement (https://medrxiv.org/highwire/filestream/91646/field_highwire_adjunct_files/0/2020.07.29.20164590-1.pdf)
Supplement: Supplementary file [file 2020.07.29.20164590-1.pdf]

## Appendix to ‘Household transmission of SARS-CoV-2: a systematic review and meta-analysis of secondary attack rate’

Zachary J. Madewell, Yang Yang, Ira M. Longini Jr, M. Elizabeth Halloran, Natalie E. Dean

### Table of Contents for Appendix

| <b>Contents</b>                                                                                                                                                              | <b>Page</b> |
|------------------------------------------------------------------------------------------------------------------------------------------------------------------------------|-------------|
| S1 Figure. Secondary attack rates for studies of close contacts                                                                                                              | 2           |
| S2 Figure. Household secondary attack rates, grouped by studies in China vs. other locations                                                                                 | 3           |
| S3 Figure. Secondary attack rates grouped by studies that tested only symptomatic household contacts and studies that tested all household contacts irrespective of symptoms | 4           |
| S1 Table. Summary of studies for review of household transmissibility of SARS-CoV-2                                                                                          | 5           |
| S2 Table. Assessment of factors potentially affecting susceptibility and infectivity in household transmission studies                                                       | 9           |
| S3 Table. Household secondary attack rate comparison with other viruses                                                                                                      | 11          |
| S4 Table. Overdispersion of the number of secondary infections per household                                                                                                 | 13          |
| Supplemental methods                                                                                                                                                         | 14          |
| References                                                                                                                                                                   | 16          |

**S1 Figure.** Secondary attack rates (SAR) for studies of close contacts (including individuals outside the index case household). This investigation of SARs of close contacts<sup>1-17</sup> was non-exhaustive, as it was beyond the focus of the review.

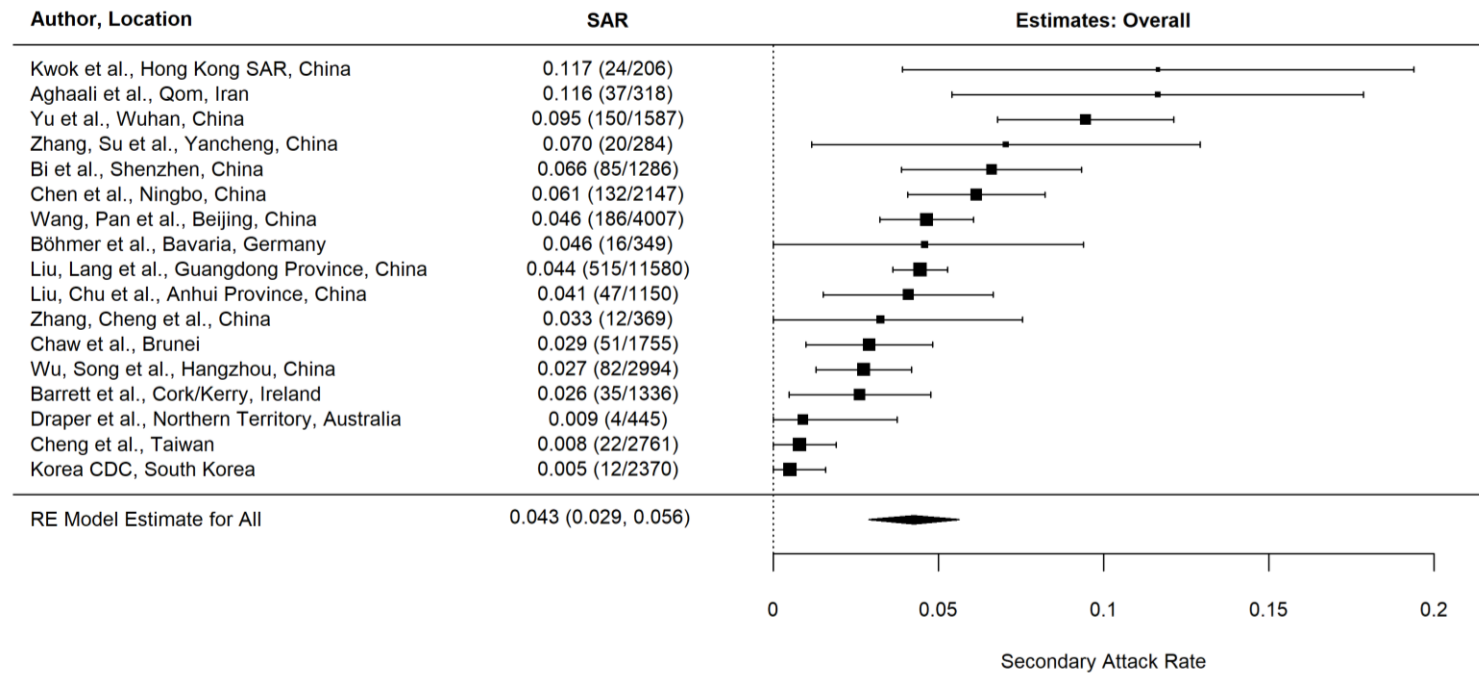

**S2 Figure.** Household secondary attack rates, grouped by studies in China vs. other locations

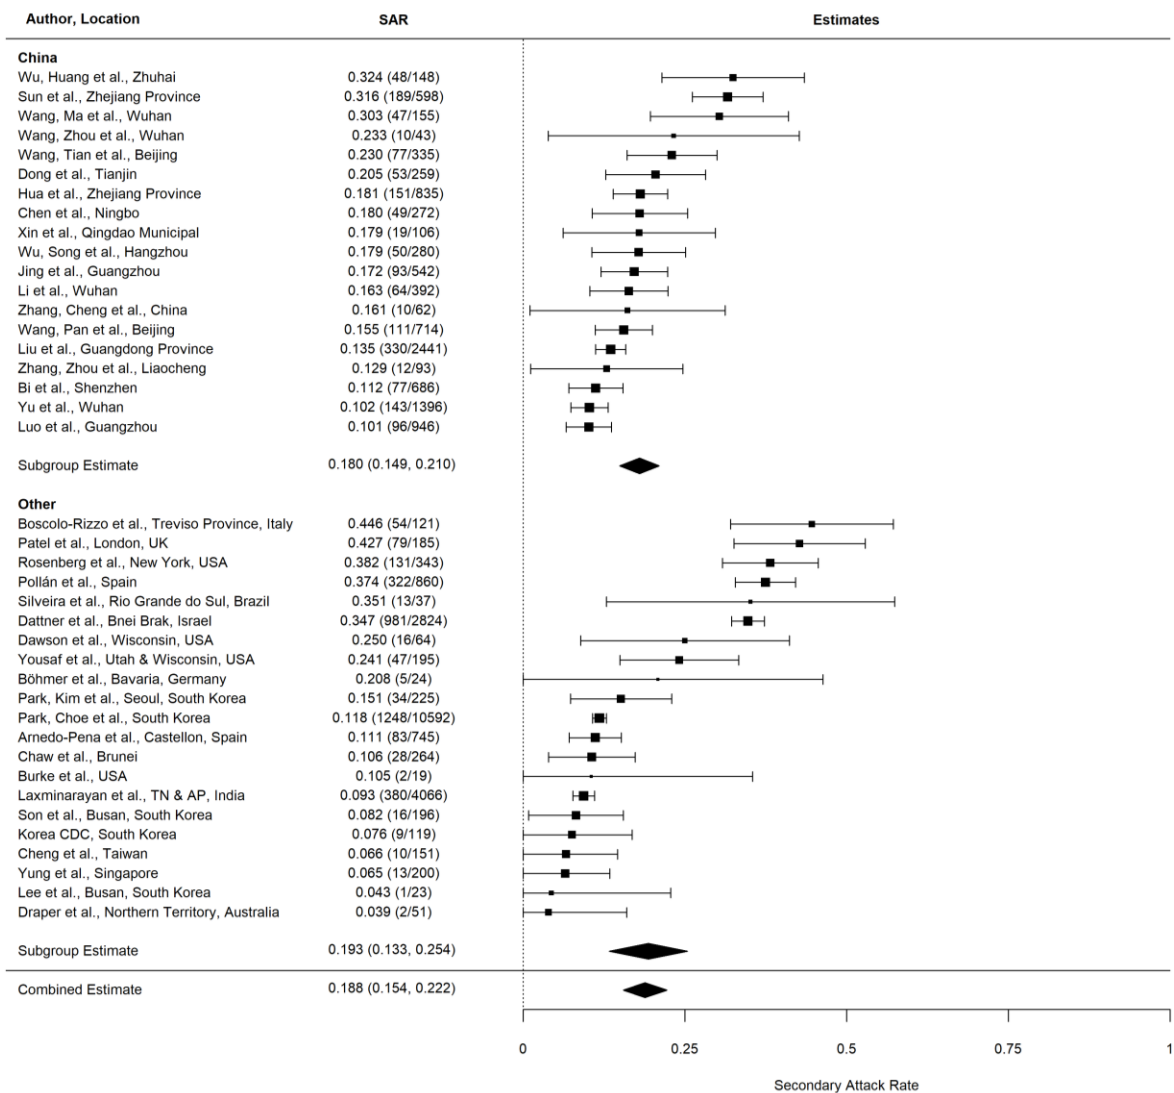

**S3 Figure.** Secondary attack rates (SAR), grouped by studies that tested only symptomatic household contacts and studies that tested all household contacts irrespective of symptoms.

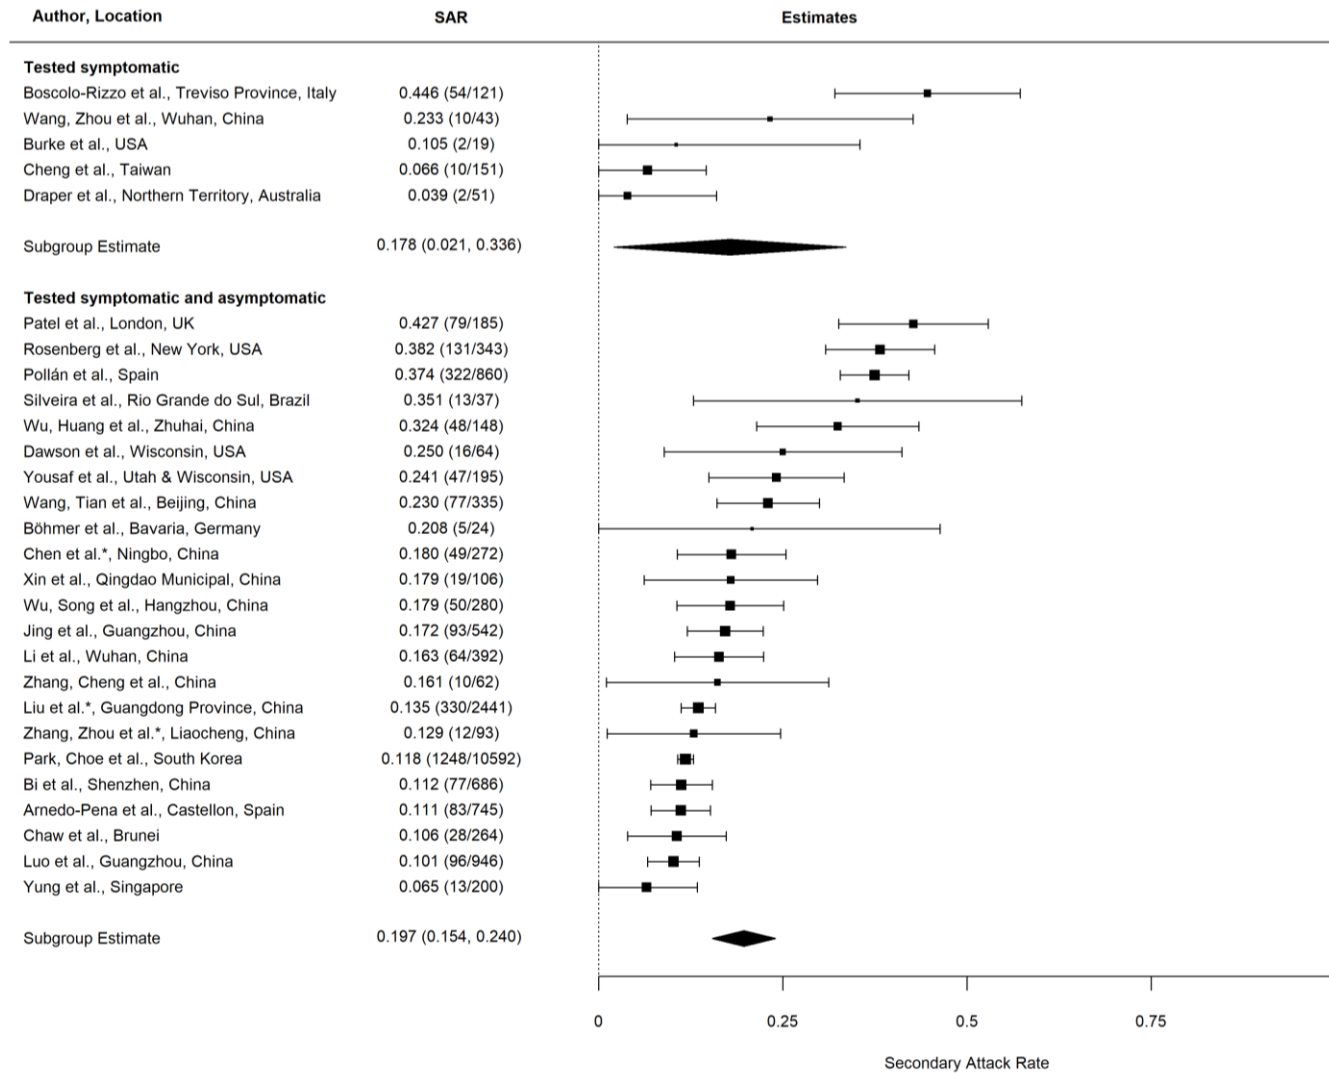

**S1 Table.** Summary of studies for review of household transmissibility of SARS-CoV-2

|                                           | <b>Location (city, country)</b>  | <b>Index case identification period</b> | <b>Test used to diagnosis contacts</b>           | <b>No. index cases</b>          | <b>Contact type</b> | <b>Overall household secondary attack rate</b> | <b>Follow up duration (days)</b> | <b>Risk factors examined:</b>                                                                                                                                                               |
|-------------------------------------------|----------------------------------|-----------------------------------------|--------------------------------------------------|---------------------------------|---------------------|------------------------------------------------|----------------------------------|---------------------------------------------------------------------------------------------------------------------------------------------------------------------------------------------|
| <i>Arnedo-Pena et al.</i> <sup>18</sup>   | Castellon, Spain                 | February 26 to April 8, 2020            | Symptom-based diagnosis (no testing of contacts) | 347 symptomatic                 | Household contacts  | 11.1% (83/745)                                 | –                                | Contact: age, sex; Index case: age, sex, cough, pneumonia, hospitalization, health profession; Number of household members, urban/rural residence                                           |
| <i>Bi et al.</i> <sup>5</sup>             | Shenzhen, China                  | January 14 to February 12, 2020         | RT-PCR                                           | 391 symptomatic or asymptomatic | Household contacts  | 11.2% (77/686)                                 | 14                               | Contact: sex, age; Index case: age; Contact frequency, shared meal, shared transportation                                                                                                   |
| <i>Böhmer et al.</i> <sup>7</sup>         | Bavaria, Germany                 | January 27 to February 11, 2020         | RT-PCR and whole genome sequencing               | –                               | Household contacts  | 20.8% (5/24)                                   | 14                               | –                                                                                                                                                                                           |
| <i>Boscolo-Rizzo et al.</i> <sup>19</sup> | Treviso province, Italy          | March 19 to March 22, 2020              | RT-PCR                                           | 179 symptomatic                 | Household contacts  | 43% (54/121)                                   | 14                               | –                                                                                                                                                                                           |
| <i>Burke et al.</i> <sup>20</sup>         | USA                              | January 20 to February 26, 2020         | –                                                | 10 symptomatic                  | Household contacts  | 10.5% (2/19)                                   | 14                               | –                                                                                                                                                                                           |
| <i>Chaw et al.</i> <sup>16</sup>          | Brunei                           | March 5 to April 4, 2020                | RT-PCR                                           | 19 symptomatic or asymptomatic  | Household contacts  | 10.6% (28/264)                                 | 14                               | Contact: age, sex; Exposure period                                                                                                                                                          |
| <i>Chen et al.</i> <sup>6</sup>           | Ningbo, China                    | January 21 to March 6, 2020             | Nucleic acid test                                | 157 symptomatic or asymptomatic | Family contacts     | 18.01% (49/272)                                | 21                               | –                                                                                                                                                                                           |
| <i>Cheng et al.</i> <sup>14</sup>         | Taiwan                           | January 15 to March 18, 2020            | RT-PCR                                           | 100 symptomatic or asymptomatic | Household contacts  | 6.6% (10/151)                                  | 14                               | Contact: age; Index case: age, clinical severity, pneumonia, acute respiratory distress syndrome/sepsis; time from illness onset in index case to contact exposure; presymptomatic exposure |
| <i>Dattner et al.</i> <sup>21</sup>       | Bnei Brak, Israel                | May 2, 2020                             | RT-PCR                                           | 637 symptomatic or asymptomatic | Household contacts  | 34.7% (981/2824)                               | –                                | Contact: age                                                                                                                                                                                |
| <i>Dawson et al.</i> <sup>22</sup>        | Milwaukee County, Wisconsin, USA | March to April, 2020                    | RT-PCR                                           | 26 symptomatic                  | Household contacts  | 25.0% (16/64)                                  | –                                | –                                                                                                                                                                                           |
| <i>Dong et al.</i> <sup>23</sup>          | Tianjin, China                   | January 7 to February 24, 2020          | RT-PCR                                           | 135 symptomatic or asymptomatic | Family contacts     | 20.46% (53/259)                                | –                                | –                                                                                                                                                                                           |
| <i>Draper et al.</i> <sup>15</sup>        | Northern Territory, Australia    | March 1 and April 30, 2020              | RT-PCR                                           | 28 symptomatic                  | Household contacts  | 3.9% (2/51)                                    | 14                               | –                                                                                                                                                                                           |

|                                          |                                      |                                |                                |                                   |                    |                      |    |                                                                                                                                                                                                                                                                                                                                                                       |
|------------------------------------------|--------------------------------------|--------------------------------|--------------------------------|-----------------------------------|--------------------|----------------------|----|-----------------------------------------------------------------------------------------------------------------------------------------------------------------------------------------------------------------------------------------------------------------------------------------------------------------------------------------------------------------------|
| <i>Hua et al.</i> <sup>24</sup>          | Zhejiang Province, China             | January 7 to February 29, 2020 | RT-PCR                         | 314 symptomatic or asymptomatic   | Family contacts    | 18.1% (151/835)      | –  | Contact: children/adults                                                                                                                                                                                                                                                                                                                                              |
| <i>Jing et al.</i> <sup>25</sup>         | Guangzhou, China                     | January 6 to February 17, 2020 | RT-PCR or sequencing           | 349 symptomatic or asymptomatic   | Household contacts | 17.1% (93/542)       | 14 | Contact: age, sex; Index case: age, sex; Number of people per household                                                                                                                                                                                                                                                                                               |
| <i>Korea CDC</i> <sup>13</sup>           | South Korea                          | January 24 to March 10, 2020   | –                              | 30 symptomatic or asymptomatic    | Household contacts | 7.56% (9/119)        | 14 | –                                                                                                                                                                                                                                                                                                                                                                     |
| <i>Laxminarayan et al.</i> <sup>26</sup> | Tamil Nadu and Andhra Pradesh, India | March 5 to June 4, 2020        | RT-PCR                         | 997 symptomatic or asymptomatic   | Household contacts | 9.0% (380/4066)      | 14 | Index case: sex                                                                                                                                                                                                                                                                                                                                                       |
| <i>Lee et al.</i> <sup>27</sup>          | Busan, South Korea                   | February 21 to March 13, 2020  | RT-PCR                         | 10 asymptomatic or presymptomatic | Household contacts | 4.3% (1/23)          | –  | –                                                                                                                                                                                                                                                                                                                                                                     |
| <i>Li et al.</i> <sup>28</sup>           | Wuhan, China                         | January 1 to February 20, 2020 | RT-PCR                         | 105 symptomatic                   | Household contacts | 16.3% (64/392)       | 14 | Contact: age, sex, relationship, exposure period; Index case: Quarantine at initiation of symptom, fever, cough                                                                                                                                                                                                                                                       |
| <i>Liu et al.</i> <sup>9</sup>           | Guangdong Province, China            | January 10 to March 15, 2020   | RT-PCR                         | 1,158 symptomatic                 | Family members     | 13.5% (330/2441)     | 14 | Contact: Age, sex, relationship; Index case: Disease history, clinical severity, dyspnea, dizzy, myalgia, shortness of breath, chill, headache, fatigue, fever, nasal congestion, pharyngalgia, cough, diarrhea, arthralgia, rhinorrhea, vomit, expectoration, chest tightness, palpitation, nausea, poor appetite, abdominal pain, chest pain; Shared transportation |
| <i>Luo et al.</i> <sup>29</sup>          | Guangzhou, China                     | January 13 to March 6, 2020    | RT-PCR                         | 69 symptomatic or asymptomatic    | Household contacts | 10.2% (96/946)       | 14 | Contact: age, sex; Index case: Clinical severity, fever, cough, expectoration, fatigue, myalgia Shared vehicle                                                                                                                                                                                                                                                        |
| <i>Park, Choe et al.</i> <sup>30</sup>   | South Korea                          | January 20 to March 27, 2020   | RT-PCR                         | 5,706 symptomatic or asymptomatic | Household contacts | 11.8% (1,248/10,592) | 14 | –                                                                                                                                                                                                                                                                                                                                                                     |
| <i>Park, Kim et al.</i> <sup>31</sup>    | Seoul, South Korea                   | February 21 to March 8, 2020   | RT-PCR                         | 97 symptomatic or asymptomatic    | Household contacts | 15.1% (34/225)       | 14 | –                                                                                                                                                                                                                                                                                                                                                                     |
| <i>Patel et al.</i> <sup>32</sup>        | London, UK                           | March 1 to April 1, 2020       | COVID-19 symptoms (no testing) | 141 symptomatic                   | Household contacts | 43% (79/185)         | –  | –                                                                                                                                                                                                                                                                                                                                                                     |
| <i>Pollán et al.</i> <sup>33</sup>       | Spain                                | April 27 to May 11, 2020       | Immunoassay antibody test      | –                                 | Household contacts | 37.4% (322/860)      | –  | –                                                                                                                                                                                                                                                                                                                                                                     |
| <i>Rosenberg et al.</i> <sup>34</sup>    | New York, USA                        | March 2 to March 12            | Molecular SARS-CoV-2 tests     | 229 symptomatic or asymptomatic   | Household contacts | 38% (131/343)        | –  | Contact: age; Number of people in household                                                                                                                                                                                                                                                                                                                           |

|                                        |                           |                                   |                         |                                 |                    |                  |    |                                                                                                                                                                                                                                                                                                                                                                                                                                                                                                                                                                                                                                                                                                                                                                                                                                                                                                                                                                                                                                     |
|----------------------------------------|---------------------------|-----------------------------------|-------------------------|---------------------------------|--------------------|------------------|----|-------------------------------------------------------------------------------------------------------------------------------------------------------------------------------------------------------------------------------------------------------------------------------------------------------------------------------------------------------------------------------------------------------------------------------------------------------------------------------------------------------------------------------------------------------------------------------------------------------------------------------------------------------------------------------------------------------------------------------------------------------------------------------------------------------------------------------------------------------------------------------------------------------------------------------------------------------------------------------------------------------------------------------------|
| <i>Silveira et al.</i> <sup>35</sup>   | Rio Grande do Sul, Brazil | April 10–12 and 25–27             | Wondfo Antibody Test    | 18 symptomatic or asymptomatic  | Household contacts | 35.1% (13/37)    | –  | –                                                                                                                                                                                                                                                                                                                                                                                                                                                                                                                                                                                                                                                                                                                                                                                                                                                                                                                                                                                                                                   |
| <i>Son et al.</i> <sup>36</sup>        | Busan, South Korea        | January 16 to March 24, 2020      | RT-PCR                  | 108 symptomatic or asymptomatic | Household contacts | 8.2% (16/196)    | –  | –                                                                                                                                                                                                                                                                                                                                                                                                                                                                                                                                                                                                                                                                                                                                                                                                                                                                                                                                                                                                                                   |
| <i>Sun et al.</i> <sup>37</sup>        | Zhejiang Province, China  | January 20 to February 10, 2020   | –                       | 148 symptomatic or asymptomatic | Household contacts | 31.61% (189/598) | –  | Contact: age, sex, relationship                                                                                                                                                                                                                                                                                                                                                                                                                                                                                                                                                                                                                                                                                                                                                                                                                                                                                                                                                                                                     |
| <i>Xin et al.</i> <sup>38</sup>        | Qingdao Municipal, China  | January 20 to March 27, 2020      | RT-PCR                  | 31 symptomatic or asymptomatic  | Household contacts | 17.9% (19/106)   | 14 | Contact: sex, age, effective contact days, relationship, contact frequency<br>Index case: sex, age, underlying diseases, fever, cough, myalgia, fatigue, time from illness onset to hospital admission, time from illness onset to lab confirmation, disease severity, white blood cell count, lymphocyte count, neutrophil percentage, lymphocyte percentage                                                                                                                                                                                                                                                                                                                                                                                                                                                                                                                                                                                                                                                                       |
| <i>Wang, Ma et al.</i> <sup>39</sup>   | Wuhan, China              | February 13 and February 14, 2020 | RT-PCR                  | 85 symptomatic                  | Household contacts | 30% (47/155)     | 14 | –                                                                                                                                                                                                                                                                                                                                                                                                                                                                                                                                                                                                                                                                                                                                                                                                                                                                                                                                                                                                                                   |
| <i>Wang, Pan et al.</i> <sup>17</sup>  | Beijing, China            | January 1 to April 3, 2020        | RT-PCR, gene sequencing | 585 symptomatic or asymptomatic | Household contacts | 15.6% (111/714)  | 14 | –                                                                                                                                                                                                                                                                                                                                                                                                                                                                                                                                                                                                                                                                                                                                                                                                                                                                                                                                                                                                                                   |
| <i>Wang, Tian et al.</i> <sup>40</sup> | Beijing, China            | February 21, 2020                 | RT-PCR, gene sequencing | 41 symptomatic                  | Household contacts | 23.0% (77/335)   | 14 | Index case: age, sex, education, clinical severity, fever, diarrhea, comorbidity;<br>Time interval from illness onset to first hospital visit, time interval from illness onset to medical isolation, time interval from illness onset to laboratory confirmation, knowledge score on COVID-19 before illness onset, self-awareness of being infected with SARS-CoV-2 when developed illness, knowledge of own infectiousness after illness onset, wear mask at home after illness onset, self-isolated after illness onset, eat separately at home after illness onset, eat with separate tableware, score on hand hygiene; family size, close contact with primary cases at home (no. times), no. family members wearing mask at home before primary case's illness onset date, no. family members wearing mask at home after primary case's illness onset date, residential area per person, number of bedrooms per person, number of washrooms, frequency of room cleaning, frequency of disinfectant use, ventilation duration |

|                                          |                         |                                 |                    |                                 |                    |                  |    |                                                                                                                                                                                                                                                                                                                                                                                                                                                                                                          |
|------------------------------------------|-------------------------|---------------------------------|--------------------|---------------------------------|--------------------|------------------|----|----------------------------------------------------------------------------------------------------------------------------------------------------------------------------------------------------------------------------------------------------------------------------------------------------------------------------------------------------------------------------------------------------------------------------------------------------------------------------------------------------------|
| <i>Wang, Zhou et al.</i> <sup>41</sup>   | Wuhan, China            | January 5 to 12 February, 2020  | Nucleotide tests   | 25 symptomatic                  | Family contacts    | 23.3% (10/43)    | –  | –                                                                                                                                                                                                                                                                                                                                                                                                                                                                                                        |
| <i>Wu, Huang et al.</i> <sup>42</sup>    | Zhuhai, China           | January 17 to February 29, 2020 | RT-PCR             | 35 symptomatic or asymptomatic  | Household contacts | 32.4% (48/148)   | 21 | Contact: age, sex, BMI, smoking, relationship, education, underlying medical issues;<br>Index case: age, sex, smoking, BMI, education, coughing, fever, lymphocyte count,<br>Exposure hours after index case onset, physical contact, shared meal, shared living room, shared vehicle, number of contacts in household, no protective measures of contacts, ventilation and disinfection, separate dining, hours spending at home of index case; onset to admission time, indoor isolation, wearing mask |
| <i>Wu, Song et al.</i> <sup>11</sup>     | Hangzhou, China         | January 23 to February 28, 2020 | –                  | 144 symptomatic or asymptomatic | Household contacts | 17.86% (50/280)  | 14 | Contact: sex, age;<br>Protective measures, shared transport                                                                                                                                                                                                                                                                                                                                                                                                                                              |
| <i>Yousaf et al.</i> <sup>43</sup>       | Wisconsin and Utah, USA | March 22 to April 22, 2020      | RT-PCR             | –                               | Household contacts | 24.1% (47/195)   | 14 | –                                                                                                                                                                                                                                                                                                                                                                                                                                                                                                        |
| <i>Yu et al.</i> <sup>3</sup>            | Wuhan, China            | January 14 to February 14, 2020 | –                  | 560 symptomatic                 | Family contacts    | 10.2% (143/1396) | 14 | Contact: sex, age;<br>Contact frequency                                                                                                                                                                                                                                                                                                                                                                                                                                                                  |
| <i>Yung et al.</i> <sup>44</sup>         | Singapore               | March 5 to April 30, 2020       | RT-PCR             | 223 symptomatic                 | Household contacts | 6.1% (13/200)    | 14 | –                                                                                                                                                                                                                                                                                                                                                                                                                                                                                                        |
| <i>Zhang, Cheng et al.</i> <sup>10</sup> | China                   | January 28 to March 15, 2020    | Nucleic acid tests | 359 symptomatic or asymptomatic | Household contacts | 16.1% (10/62)    | –  | Contact: age, sex;<br>Contact frequency;<br>Index case: severity of symptoms                                                                                                                                                                                                                                                                                                                                                                                                                             |
| <i>Zhang, Zhou et al.</i> <sup>45</sup>  | Liaocheng, China        | January 13 to 26, 2020          | RT-PCR             | 11 symptomatic or asymptomatic  | Family contacts    | 12.90% (12/93)   | –  | –                                                                                                                                                                                                                                                                                                                                                                                                                                                                                                        |



**S2 Table.** Assessment of factors potentially affecting susceptibility and infectivity in household transmission studies

| Risk factors                               | Overall number of studies | Number of studies reporting significant associations |
|--------------------------------------------|---------------------------|------------------------------------------------------|
| <i>Susceptibility (of contacts)</i>        |                           |                                                      |
| Age                                        | 18                        | 12                                                   |
| Sex                                        | 14                        | 3                                                    |
| Exposure period (to index case)            | 7                         | 3                                                    |
| Relationship                               | 6                         | 4                                                    |
| Underlying medical conditions              | 1                         | 1                                                    |
| BMI                                        | 1                         | 0                                                    |
| Educational attainment                     | 1                         | 0                                                    |
| <i>Infectivity (of index case)</i>         |                           |                                                      |
| Cough                                      | 7                         | 2                                                    |
| Sex                                        | 7                         | 2                                                    |
| Clinical severity                          | 6                         | 3                                                    |
| Age                                        | 6                         | 1                                                    |
| Fever                                      | 6                         | 0                                                    |
| Myalgia                                    | 3                         | 1                                                    |
| Fatigue                                    | 3                         | 0                                                    |
| Pneumonia                                  | 2                         | 2                                                    |
| Diarrhea                                   | 2                         | 1                                                    |
| Expectoration                              | 2                         | 1                                                    |
| Lymphocyte count                           | 2                         | 1                                                    |
| Comorbidity                                | 2                         | 0                                                    |
| Educational attainment                     | 2                         | 0                                                    |
| Acute respiratory distress syndrome/sepsis | 1                         | 1                                                    |
| Chills                                     | 1                         | 1                                                    |
| Dizziness                                  | 1                         | 1                                                    |
| Health profession                          | 1                         | 1                                                    |
| Hospitalization                            | 1                         | 1                                                    |
| Neutrophil percentage                      | 1                         | 1                                                    |
| Abdominal pain                             | 1                         | 0                                                    |
| Arthralgia                                 | 1                         | 0                                                    |
| BMI                                        | 1                         | 0                                                    |
| Chest tightness                            | 1                         | 0                                                    |
| Dyspnea                                    | 1                         | 0                                                    |
| Headache                                   | 1                         | 0                                                    |
| Nasal congestion                           | 1                         | 0                                                    |
| Nausea                                     | 1                         | 0                                                    |

|                                                                         |   |   |
|-------------------------------------------------------------------------|---|---|
| Palpitation                                                             | 1 | 0 |
| Pharyngalgia                                                            | 1 | 0 |
| Poor appetite                                                           | 1 | 0 |
| Rhinorrhea                                                              | 1 | 0 |
| Vomiting                                                                | 1 | 0 |
| White blood cell count                                                  | 1 | 0 |
| <i>Awareness and behavioral factors</i>                                 |   |   |
| Shared vehicle (with index case)                                        | 6 | 5 |
| Contact frequency                                                       | 6 | 4 |
| Contacts wore face masks                                                | 3 | 3 |
| Shared meal                                                             | 3 | 2 |
| Self-isolated after illness onset                                       | 3 | 1 |
| Time interval from illness onset to hospital admission                  | 3 | 0 |
| Disinfectant use <sup>a</sup>                                           | 2 | 1 |
| Ventilation duration <sup>a</sup>                                       | 2 | 1 |
| Wear mask at home after illness onset                                   | 2 | 1 |
| Time interval from illness onset to laboratory confirmation             | 2 | 0 |
| Knowledge of own infectiousness after illness onset                     | 1 | 1 |
| Physical contact                                                        | 1 | 1 |
| Shared living room                                                      | 1 | 1 |
| Contacts smoking status                                                 | 1 | 0 |
| Frequency of room cleaning (wet type)                                   | 1 | 0 |
| Index case eats with separate tableware                                 | 1 | 0 |
| Index case hand hygiene                                                 | 1 | 0 |
| Index case smoking status                                               | 1 | 0 |
| Knowledge score on COVID-19 before illness onset                        | 1 | 0 |
| Self-awareness of being infected with SARS-CoV-2 when developed illness | 1 | 0 |
| Time interval from illness onset to medical isolation                   | 1 | 0 |
| <i>Household characteristics</i>                                        |   |   |
| Number of people in household                                           | 5 | 2 |
| Number of bedrooms per person                                           | 1 | 0 |
| Number of washrooms                                                     | 1 | 0 |
| Residential area per person                                             | 1 | 0 |
| Separate dining area                                                    | 1 | 0 |
| Urban/rural residence                                                   | 1 | 0 |

<sup>a</sup> Includes one study that combined ventilation and disinfection, which was not significant

**S3 Table.** Household secondary attack rate comparison with other viruses

|                                         | <b>Location</b>                        | <b>Ref.</b>   | <b>Number of index cases</b>                 | <b>Overall household secondary attack rate</b>                                | <b>Definition of household contact</b> | <b>Case ascertainment</b>                                        |
|-----------------------------------------|----------------------------------------|---------------|----------------------------------------------|-------------------------------------------------------------------------------|----------------------------------------|------------------------------------------------------------------|
| <b>Middle East Respiratory Syndrome</b> |                                        |               |                                              |                                                                               |                                        |                                                                  |
| <i>Al Hosani et al.</i>                 | Abu Dhabi, United Arab Emirates        | <sup>46</sup> | 34                                           | 0% (0/105)                                                                    | Household contacts                     | RT-PCR                                                           |
| <i>Arwady et al.</i>                    | Al-Qouz, Saudi Arabia                  | <sup>47</sup> | 5                                            | 24% (19/79)                                                                   | Family contacts                        | RT-PCR                                                           |
| <i>Assiri et al.</i>                    | Al-Hasa, Saudi Arabia                  | <sup>48</sup> | 23                                           | 2.3% (5/217)                                                                  | Household contacts                     | RT-PCR                                                           |
| <i>Drosten et al.</i>                   | Saudi Arabia                           | <sup>49</sup> | 26                                           | 4% (12/280)                                                                   | Household contacts                     | RT-PCR                                                           |
| <i>Memish et al.</i>                    | Al-Madinah al-Munawwarah, Saudi Arabia | <sup>50</sup> | 18                                           | 1.8% (1/56)                                                                   | Household contacts                     | RT-PCR                                                           |
| <i>Payne et al.</i>                     | Jordan                                 | <sup>51</sup> | 16                                           | 9% (2/23)                                                                     | Household contacts                     | RT-PCR                                                           |
| <i>Van Kerkhove et al.</i>              | Riyadh, Saudi Arabia                   | <sup>52</sup> | 7                                            | 5.1% (12/234.5)                                                               | Household contacts                     | RT-PCR                                                           |
| <b>SARS-CoV</b>                         |                                        |               |                                              |                                                                               |                                        |                                                                  |
| <i>Chan et al.</i>                      | Hong Kong, China                       | <sup>53</sup> | 99                                           | 12.3% (30/243)                                                                | Household contacts                     | Positive contacts identified by the Hong Kong SARS registry      |
| <i>Goh et al.</i>                       | Singapore                              | <sup>54</sup> | 114                                          | 6.2% (26/417)                                                                 | Household contacts                     | PCR or serologic test                                            |
| <i>Lau et al.</i>                       | Hong Kong, China                       | <sup>55</sup> | 881                                          | 8% (188/2139)                                                                 | Household contacts                     | Symptomatic probable cases (no testing)                          |
| <i>Lee et al.</i>                       | Taiwan                                 | <sup>56</sup> | 13                                           | 0% (0/29)                                                                     | Household contacts                     | Serology IgG standard indirect immunofluorescence antibody assay |
| <i>Ou et al.</i>                        | Beijing, China                         | <sup>57</sup> | 232                                          | 3.3% (18/550)                                                                 | Household contacts                     | –                                                                |
| <i>Wilson-Clark et al.</i>              | Toronto, Canada                        | <sup>58</sup> | 74                                           | 10.2% (18/176)                                                                | Household contacts                     | Symptom-based diagnosis (no testing)                             |
| <b>Other coronaviruses</b>              |                                        |               |                                              |                                                                               |                                        |                                                                  |
| <i>Beale et al.</i>                     | England, UK                            | <sup>59</sup> | 70 HCoV-OC43<br>45 HCoV-229E<br>55 HCoV-NL63 | HCoV-OC43: 13.2% (7/53)<br>HCoV-229E: 10.1% (7/69)<br>HCoV-NL63: 11.9% (5/42) | Household contacts                     | RT-PCR                                                           |
| <i>Esposito et al.</i>                  | Milan, Italy                           | <sup>60</sup> | 33 HCoV-229E<br>13 HCoV-NL63<br>11 HCoV-OC43 | HCoV-229E: 14.9% (14/94)<br>HCoV-NL63: 0% (0/45)<br>HCoV-OC43: 13.2% (5/38)   | Household contacts                     | RT-PCR                                                           |

|                                    |                                          |               |                                                                  |                                                                                                                                             |                    |        |
|------------------------------------|------------------------------------------|---------------|------------------------------------------------------------------|---------------------------------------------------------------------------------------------------------------------------------------------|--------------------|--------|
| <i>Health Protection Agency UK</i> | London, UK                               | <sup>61</sup> | 1                                                                | Unspecified novel coronavirus: 2.6% (1/39)                                                                                                  | Household contacts | RT-PCR |
| <i>Monto et al.</i>                | Michigan, USA                            | <sup>62</sup> | 263 HCoV-OC43<br>113 HCoV-229E<br>141 HCoV-HKU1<br>217 HCoV-NL63 | HCoV-OC43: 10.6%<br>HCoV-229E: 7.2%<br>HCoV-HKU1: 8.6%<br>HCoV-NL63: 12.6%                                                                  | Household contacts | RT-PCR |
| <b>Influenza</b>                   |                                          |               |                                                                  |                                                                                                                                             |                    |        |
| <i>Tseng et al.</i>                | Review of household transmission studies | <sup>63</sup> |                                                                  | SAR ranged from 1–38% based on PCR-confirmed infection, 6–35% based on influenza-like illness, and 3–31% based on acute respiratory illness |                    |        |

**S4 Table.** Overdispersion of the number of secondary infections per household.

To examine for potential over-dispersion, we crudely assume that all households have size equal to the average number of contacts and equal secondary attack rate. Then,  $\text{Pr}[\geq 1 \text{ secondary infection in a household}] = 1 - (1 - \text{SAR})^n$ , where  $n$  is the average number of contacts for that study. This is a crude analysis that does not consider heterogeneity in household size. Given this limitation, statistical significance is not assessed, with results intended for illustration only.

| <b>Author</b>            | <b>Location</b>               | <b>Average number of contacts per household</b> | <b>Secondary attack rate</b> | <b>Proportion of households reporting any secondary transmission from index cases</b> | <b>Probability of <math>\geq 1</math> secondary infection in a household</b> |
|--------------------------|-------------------------------|-------------------------------------------------|------------------------------|---------------------------------------------------------------------------------------|------------------------------------------------------------------------------|
| <i>Wu, Huang et al.</i>  | Zhuhai, China                 | 4.229                                           | 0.324                        | 0.629                                                                                 | 0.809                                                                        |
| <i>Rosenberg et al.</i>  | New York, USA                 | 3.330                                           | 0.382                        | 0.612                                                                                 | 0.799                                                                        |
| <i>Wang, Tian et al.</i> | Beijing, China                | 2.702                                           | 0.230                        | 0.331                                                                                 | 0.506                                                                        |
| <i>Yung et al.</i>       | Singapore                     | 1.493                                           | 0.065                        | 0.052                                                                                 | 0.095                                                                        |
| <i>Draper et al.</i>     | Northern Territory, Australia | 1.821                                           | 0.039                        | 0.036                                                                                 | 0.070                                                                        |

## Supplemental methods

### SARS-CoV-2

- *Bi et al.*: Contact age was reported in increments of ten years (0-9, 10-19,...), which we categorized into 0-19 and  $\geq 20$  (children category includes 18 and 19 years).<sup>5</sup>
- *Böhmer et al.*: SAR reported as 75.0% (95% CI 19.0–99.0%; 3/4) among members of a household cluster in common isolation and 10.0% (1.2–32.0%; 2/20) among household contacts only together until isolation of the patient, so overall SAR=5/24=20.8%.<sup>7</sup>
- *Chaw et al.*: There were 12 infections among 85 children, 13 infections among 31 spouses, and 3 infections among 148 other household contacts, so overall household SAR=28/264=10.6%, children SAR=12/85=14.1%, and adult SAR=16/179=8.9%.<sup>16</sup>
- *Chen et al.*: Family SAR (18.01%) and total number of family members (272) were provided, so the number of infected family members=.1801\*272=49.<sup>6</sup>
- *Cheng et al.*: Total number of household secondary cases (10) and number of household contacts (151) were provided, so overall household SAR=10/151=6.6%.<sup>14</sup> Contact age was reported as 0-19; 20-39; 40-59;  $\geq 60$ , which we categorized into 0-19 years and  $\geq 20$  years (children category includes 18 and 19 years).
- *Dattner et al.*: This study reported a total of 1544 children including index cases, 512 of which were infected (33%).<sup>21</sup> Excluding the index cases, they reported that 25% of children were infected, but did not provide the numerator or denominator. Therefore, we estimated the number of index cases, secondary infections, and total contacts by solving for x:  $(512-x)/(1544-x)=.25$ ;  $x=168$  index cases;  $512-168=344$  secondary infections among children;  $1544-168=1376$  total contacts. This study also reported a total of 1809 adults including index cases, 998 of which were infected (55%). Excluding the index cases, they reported 44% of adults were infected, but did not provide the numerator or denominator. Solving again for x, we estimate there were:  $(998-x)/(1809-x)=.44$ ;  $x=361$  index cases;  $998-361=637$  secondary infections among adults;  $1809-361=1448$  total contacts. The total number of infected secondary infections=344+637=981, the total number of contacts=1376+1448=2824, and overall SAR=981/2824=34.7%.
- *Draper et al.*: This study reported 2 infections among 51 total household contacts, both from the same household.<sup>15</sup> The total number of households were not reported, but since there were 28 total index cases, we assumed there were 28 households and 1/28 households (3.6%) had secondary infections.
- *Hua et al.*: This study reported 151 total infections and 684 negative results, so overall SAR=151/835=18.1%.<sup>24</sup>
- *Jing et al.*: We calculated the total number of household contacts at the same residential address as the number of household secondary cases (93) plus the number of uninfected household contacts (449), which is 542. The total number of female contacts = 53 infected + 227 uninfected = 280; total male contacts = 40 infected + 218 uninfected = 258. Total contacts <20 years = 8 infected + 117 uninfected = 125 total children (includes 18 and 19 years). We collapsed adults into  $\geq 20$  years: there were 85 infected + 327 uninfected = 412 total.
- *Liu et al.*: There were 131 infections among 563 total spouses and 199 infections among 1878 non-spouse family members, so overall SAR =  $(131+199)/(563+1878) = 330/2441 = 13.5\%$ .<sup>9</sup> Contact age was reported as 0-9 years, 10-19 years, ..., which we collapsed to 0-19 and  $\geq 20$  categories (children category includes 18 and 19 years).
- *Park, Kim et al.*: This article reported 17 contacts of asymptomatic index patients, but Table 1 reported 15 total (4 asymptomatic and 11 presymptomatic).<sup>31</sup> We used 15 contacts in our analysis as depicted in the table as the more conservative estimate.

- *Pollán et al.*: Household SAR was reported for a point-of-care test (31.4%) and immunoassay (37.4%).<sup>33</sup> The manuscript reported that a verification study of the tests demonstrated higher sensitivity for the immunoassay than the point-of-care test, so we included the immunoassay SAR (37.4%) in this review. With a SAR of 37.4% and 860 total household members, we calculated 322 positive household contacts.
- *Silveira et al.*: This study included 18 total index cases.<sup>35</sup> The article reported that two index cases lived alone, but Supplementary Table 5 indicates that a third also had no family members, so there were 15 households with family members. In two of the households, no family members were tested, so there were 13 households with family members tested, six of which had any positive family members (46.2%).
- *Wu, Huang et al.*: Contact age was reported as 0-3, 4-18, 19-60, and >61 years categories, which we collapsed into  $\leq 18$  and  $>18$  categories (children category includes 18 years).<sup>42</sup>
- *Yung et al.*: Contact age reported as 0-4; 5-9; 10-16 years (children category does not include 17 years).<sup>44</sup>

*Other viruses:*

- *Ou et al.*: This study reported SARs for household members who contacted the index case during the symptomatic period (SAR: 4.6%; 383 total) and during the incubation period (SAR: 0%; 167 total), so overall SAR= $18/550=3.3\%$ .<sup>57</sup>
- *Van Kerkhove et al.*: There were 828 total workers in 24 villas.<sup>52</sup> If each villa was considered a house, there were  $828/24=34.5$  workers per house. There were 19 infected workers in 7 villas. Without the index cases, there were  $19-7=12$  infected contacts and  $33.5*7=235$  total household contacts. SAR= $12/235=5.1\%$ .

## References

1. Kwok KO, Wong VWY, Wei WI, Wong SYS, Tang JW-T. Epidemiological characteristics of the first 53 laboratory-confirmed cases of COVID-19 epidemic in Hong Kong, 13 February 2020. *Eurosurveillance* 2020; **25**(16): 2000155.
2. Aghaali M, Kolifarhood G, Nikbakht R, Saadati HM, Hashemi Nazari SS. Estimation of the serial interval and basic reproduction number of COVID-19 in Qom, Iran, and three other countries: A data-driven analysis in the early phase of the outbreak. *Transboundary and Emerging Diseases* 2020.
3. Yu HJ, Hu YF, Liu XX, et al. Household infection: The predominant risk factor for close contacts of patients with COVID-19. *Travel Medicine and Infectious Disease* 2020; **36**: 101809.
4. Zhang HJ, Su YY, Xu SL, et al. Asymptomatic and symptomatic SARS-CoV-2 infections in close contacts of COVID-19 patients: a seroepidemiological study. *Clinical Infectious Diseases* 2020.
5. Bi Q, Wu Y, Mei S, et al. Epidemiology and transmission of COVID-19 in 391 cases and 1286 of their close contacts in Shenzhen, China: a retrospective cohort study. *The Lancet Infectious Diseases* 2020.
6. Chen Y, Wang AH, Yi B, et al. [Epidemiological characteristics of infection in COVID-19 close contacts in Ningbo city]. *Zhonghua Liu Xing Bing Xue Za Zhi* 2020; **41**(5): 667-71.
7. Böhmer MM, Buchholz U, Corman VM, et al. Investigation of a COVID-19 outbreak in Germany resulting from a single travel-associated primary case: a case series. *The Lancet Infectious Diseases* 2020.
8. Liu Z, Chu R, Gong L, Su B, Wu J. The assessment of transmission efficiency and latent infection period on asymptomatic carriers of SARS-CoV-2 infection. *International Journal of Infectious Diseases* 2020.
9. Liu T, Liang W, Zhong H, et al. Risk factors associated with COVID-19 infection: a retrospective cohort study based on contacts tracing. *Emerging Microbes & Infections* 2020: 1-31.
10. Zhang W, Cheng W, Luo L, et al. Secondary Transmission of Coronavirus Disease from Presymptomatic Persons, China. *Emerging Infectious Diseases* 2020; **26**(8).
11. Wu Y, Song S, Kao Q, Kong Q, Sun Z, Wang B. Risk of SARS-CoV-2 infection among contacts of individuals with COVID-19 in Hangzhou, China. *Public Health* 2020; **185**: 57-9.
12. Barrett PM, Bambury N, Kelly L, Condon R, Crompton J, Sheahan A. Measuring the effectiveness of an automated text messaging active surveillance system for COVID-19 in the south of Ireland, March to April 2020. *Euro Surveillance* 2020; **25**(23).



13. Coronavirus Disease-19: Summary of 2,370 Contact Investigations of the First 30 Cases in the Republic of Korea. *Osong Public Health and Research Perspectives* 2020; **11**(2): 81-4.
14. Cheng HY, Jian SW, Liu DP, Ng TC, Huang WT, Lin HH. Contact Tracing Assessment of COVID-19 Transmission Dynamics in Taiwan and Risk at Different Exposure Periods Before and After Symptom Onset. *JAMA Internal Medicine* 2020.
15. Draper AD, Dempsey KE, Boyd RH, et al. The first 2 months of COVID-19 contact tracing in the Northern Territory of Australia, March-April 2020. *Communicable Diseases Intelligence* 2020; **44**.
16. Chaw L, Koh WC, Jamaludin SA, Naing L, Alikhan MF, Wong J. SARS-CoV-2 transmission in different settings: Analysis of cases and close contacts from the Tablighi cluster in Brunei Darussalam. *medRxiv* 2020.
17. Wang X, Pan Y, Zhang D, et al. Basic epidemiological parameter values from data of real-world in mega-cities: the characteristics of COVID-19 in Beijing, China. *BMC Infectious Diseases* 2020; **20**(1): 526.
18. Arnedo-Pena A, Sabater-Vidal S, Meseguer-Ferrer N, et al. COVID-19 secondary attack rate and risk factors in household contacts in Castellon (Spain): Preliminary report. *Enfermedades Emergentes* 2020; **19**(2): 64-70.
19. Boscolo-Rizzo P, Borsetto D, Spinato G, et al. New onset of loss of smell or taste in household contacts of home-isolated SARS-CoV-2-positive subjects. *European Archives of Oto-rhino-laryngology* 2020: 1-4.
20. Burke RM. Active monitoring of persons exposed to patients with confirmed COVID-19—United States, January–February 2020. *MMWR Morbidity and mortality weekly report* 2020; **69**.
21. Dattner I, Goldberg Y, Katriel G, et al. The role of children in the spread of COVID-19: Using household data from Bnei Brak, Israel, to estimate the relative susceptibility and infectivity of children. *medRxiv* 2020.
22. Dawson P, Rabold EM, Laws RL, et al. Loss of Taste and Smell as Distinguishing Symptoms of COVID-19. *Clinical Infectious Diseases* 2020.
23. Dong XC, Li JM, Bai JY, et al. [Epidemiological characteristics of confirmed COVID-19 cases in Tianjin]. *Zhonghua Liu Xing Bing Xue Za Zhi* 2020; **41**(5): 638-41.
24. Hua CZ, Miao ZP, Zheng JS, et al. Epidemiological features and viral shedding in children with SARS-CoV-2 infection. *Journal of Medical Virology* 2020.
25. Jing Q-L, Liu M-J, Yuan J, et al. Household secondary attack rate of COVID-19 and associated determinants in Guangzhou, China: a retrospective cohort study. *The Lancet Infectious Diseases* 2020.

26. Laxminarayan R, Wahl B, Dudala SR, et al. Epidemiology and transmission dynamics of COVID-19 in two Indian states. *medRxiv* 2020.
27. Lee M, Eun Y, Park K, Heo J, Son H. Follow up investigation of asymptomatic COVID-19 cases at diagnosis in Busan, Korea. *Epidemiology and Health* 2020; **0**(0): e2020046-0.
28. Li W, Zhang B, Lu J, et al. The characteristics of household transmission of COVID-19. *Clinical Infectious Diseases* 2020.
29. Luo L, Liu D, Liao X-l, et al. Modes of Contact and Risk of Transmission in COVID-19: A Prospective Cohort Study 4950 Close Contact Persons in Guangzhou of China. 2020.
30. Park YJ, Choe YJ, Park O, et al. Contact Tracing during Coronavirus Disease Outbreak, South Korea, 2020.
31. Park SY, Kim Y-M, Yi S, et al. Coronavirus Disease Outbreak in Call Center, South Korea. *Emerging Infectious Diseases* 2020; **26**(8).
32. Patel A, Charani E, Ariyanayagam D, et al. New-onset anosmia and ageusia in adult patients diagnosed with SARS-CoV-2 infection. *Clinical Microbiology and Infection* 2020.
33. Pollán M, Pérez-Gómez B, Pastor-Barriuso R, et al. Prevalence of SARS-CoV-2 in Spain (ENE-COVID): a nationwide, population-based seroepidemiological study. *Lancet* 2020.
34. Rosenberg ES, Dufort EM, Blog DS, et al. COVID-19 Testing, Epidemic Features, Hospital Outcomes, and Household Prevalence, New York State-March 2020. *Clinical Infectious Diseases* 2020.
35. Silveira M, Barros A, Horta B, et al. Repeated population-based surveys of antibodies against SARS-CoV-2 in Southern Brazil. *medRxiv* 2020.
36. Son H, Lee H, Lee M, et al. Epidemiological characteristics of and containment measures for coronavirus disease 2019 in Busan Metropolitan City, South Korea. *Epidemiology and Health* 2020: e2020035.
37. Sun WW, Ling F, Pan JR, et al. [Epidemiological characteristics of 2019 novel coronavirus family clustering in Zhejiang Province]. *Zhonghua Yu Fang Yi Xue Za Zhi* 2020; **54**(0): E027.
38. Xin H, Jiang F, Xue A, et al. Risk factors associated with occurrence of COVID-19 among household persons exposed to patients with confirmed COVID-19 in Qingdao Municipal, China. *Transboundary and Emerging Diseases* 2020.
39. Wang Z, Ma W, Zheng X, Wu G, Zhang R. Household transmission of SARS-CoV-2. *The Journal of Infection* 2020.
40. Wang Y, Tian H, Zhang L, et al. Reduction of secondary transmission of SARS-CoV-2 in households by face mask use, disinfection and social distancing: a cohort study in Beijing, China. *BMJ Global Health* 2020; **5**(5): e002794.

41. Wang X, Zhou Q, He Y, et al. Nosocomial outbreak of COVID-19 pneumonia in Wuhan, China. *The European Respiratory Journal* 2020; **55**(6).
42. Wu J, Huang Y, Tu C, et al. Household Transmission of SARS-CoV-2, Zhuhai, China, 2020. *Clinical Infectious Diseases* 2020.
43. Yousaf AR, Duca LM, Chu V, et al. A prospective cohort study in non-hospitalized household contacts with SARS-CoV-2 infection: symptom profiles and symptom change over time. *Clinical Infectious Diseases* 2020.
44. Yung CF, Kam KQ, Chong CY, et al. Household Transmission of SARS-CoV-2 from Adults to Children. *The Journal of Pediatrics* 2020.
45. Zhang JZ, Zhou P, Han DB, et al. [Investigation on a cluster epidemic of COVID-19 in a supermarket in Liaocheng, Shandong province]. *Zhonghua Liu Xing Bing Xue Za Zhi* 2020; **41**(0): E055.
46. Al Hosani FI, Kim L, Khudhair A, et al. Serologic Follow-up of Middle East Respiratory Syndrome Coronavirus Cases and Contacts-Abu Dhabi, United Arab Emirates. *Clinical Infectious Diseases* 2019; **68**(3): 409-18.
47. Arwady MA, Alraddadi B, Basler C, et al. Middle East respiratory syndrome coronavirus transmission in extended family, Saudi Arabia, 2014. *Emerging Infectious Diseases* 2016; **22**(8): 1395.
48. Assiri A, McGeer A, Perl TM, et al. Hospital outbreak of Middle East respiratory syndrome coronavirus. *The New England Journal of Medicine* 2013; **369**(5): 407-16.
49. Drosten C, Meyer B, Müller MA, et al. Transmission of MERS-coronavirus in household contacts. *New England Journal of Medicine* 2014; **371**(9): 828-35.
50. Memish ZA, Al-Tawfiq JA, Alhakeem RF, et al. Middle East respiratory syndrome coronavirus (MERS-CoV): A cluster analysis with implications for global management of suspected cases. *Travel Medicine and Infectious Disease* 2015; **13**(4): 311-4.
51. Payne DC, Biggs HM, Al-Abdallat MM, et al. Multihospital Outbreak of a Middle East Respiratory Syndrome Coronavirus Deletion Variant, Jordan: A Molecular, Serologic, and Epidemiologic Investigation. *Open Forum Infectious Diseases* 2018; **5**(5): ofy095.
52. Van Kerkhove MD, Alaswad S, Assiri A, et al. Transmissibility of MERS-CoV infection in closed setting, Riyadh, Saudi Arabia, 2015. *Emerging Infectious Diseases* 2019; **25**(10): 1802.
53. Chan LY, Wong JT, Li PK, Lui SF, Fung H, Sung J. Risk of transmission of severe acute respiratory syndrome to household contacts by infected health care workers and patients. *The American Journal of Medicine* 2004; **116**(8): 559-60.
54. Goh DL, Lee BW, Chia KS, et al. Secondary household transmission of SARS, Singapore. *Emerg Infect Dis* 2004; **10**(2): 232-4.

55. Lau JT, Lau M, Kim JH, Tsui HY, Tsang T, Wong TW. Probable secondary infections in households of SARS patients in Hong Kong. *Emerg Infect Dis* 2004; **10**(2): 235-43.
56. Lee CC, Chen SY, Chang IJ, et al. Seroprevalence of SARS coronavirus antibody in household contacts. *Epidemiology and Infection* 2005; **133**(6): 1119-22.
57. Ou J, Li Q, Zeng G, Dun Z. Efficiency of quarantine during an epidemic of severe acute respiratory syndrome-Beijing, China, 2003. *MMWR: Morbidity & Mortality Weekly Report* 2003; **52**(43): 1037-.
58. Wilson-Clark SD, Deeks SL, Gournis E, et al. Household transmission of SARS, 2003. *Canadian Medical Association Journal* 2006; **175**(10): 1219-23.
59. Beale S, Lewer D, Aldridge RW, et al. Household transmission of seasonal coronavirus infections: Results from the Flu Watch cohort study. *Wellcome Open Research* 2020; **5**(145): 145.
60. Esposito S, Bosis S, Niesters HG, et al. Impact of human coronavirus infections in otherwise healthy children who attended an emergency department. *Journal of Medical Virology* 2006; **78**(12): 1609-15.
61. Health Protection Agency UK Novel Coronavirus Investigation team. Evidence of person-to-person transmission within a family cluster of novel coronavirus infections, United Kingdom, February 2013. *Euro surveillance: bulletin Européen sur les maladies transmissibles= European communicable disease bulletin* 2013; **18**(11): 20427.
62. Monto AS, DeJonge P, Callear AP, et al. Coronavirus occurrence and transmission over 8 years in the HIVE cohort of households in Michigan. *The Journal of Infectious Diseases* 2020.
63. Tsang TK, Lau LLH, Cauchemez S, Cowling BJ. Household Transmission of Influenza Virus. *Trends in Microbiology* 2016; **24**(2): 123-33.
